# 1 Job stress and loneliness among remote workers

2 Fuyu Miyake<sup>1</sup>, Chimed-Ochir Odgerel<sup>2</sup>, Ayako Hino<sup>3</sup>, Kazunori Ikegami<sup>4</sup>, Tomohisa Nagata<sup>5</sup>,  
3 Seiichiro Tateishi<sup>6</sup>, Mayumi Tsuji<sup>7</sup>, Shinya Matsuda<sup>8</sup>, Tomohiro Ishimaru<sup>1</sup>

4

5 <sup>1</sup>Department of Environmental Epidemiology, Institute of Industrial Ecological Sciences,  
6 University of Occupational and Environmental Health, Japan, Kitakyushu, Japan

7 <sup>2</sup>Department of Public Health and Health Policy, Hiroshima University, Hiroshima, Japan

8 <sup>3</sup>Department of Mental Health, Institute of Industrial Ecological Sciences, University of  
9 Occupational and Environmental Health, Japan, Kitakyushu, Japan

10 <sup>4</sup>Department of Work Systems and Health, Institute of Industrial Ecological Sciences,  
11 University of Occupational and Environmental Health, Japan, Kitakyushu, Japan

12 <sup>5</sup>Department of Occupational Health Practice and Management, Institute of Industrial  
13 Ecological Sciences, University of Occupational and Environmental Health, Japan, Kitakyushu,  
14 Japan

15 <sup>6</sup>Department of Occupational Medicine, School of Medicine, University of Occupational and  
16 Environmental Health, Japan, Kitakyushu, Japan

17 <sup>7</sup>Department of Environmental Health, School of Medicine, University of Occupational and  
18 Environmental Health, Japan, Kitakyushu, Japan

19 <sup>8</sup>Department of Preventive Medicine and Community Health, School of Medicine, University  
20 of Occupational and Environmental Health, Japan, Kitakyushu, Japan

21

22 Corresponding author: Tomohiro Ishimaru, MD, MPH, PhD; Department of Environmental  
23 Epidemiology, Institute of Industrial Ecological Sciences, University of Occupational and  
24 Environmental Health, Japan, 1-1 Iseigaoka, Yahata-nishi-ku, Kitakyushu, Fukuoka 807-8555,  
25 Japan; Tel: +81-93-603-1611, Fax: +81-93-601-7324, email: [ishimaru@med.uoeh-u.ac.jp](mailto:ishimaru@med.uoeh-u.ac.jp)

## 26 Abstract

27 **Background:** To prevent the spread of coronavirus disease 2019 (COVID-19), physical  
28 distancing and isolation are crucial strategies in society. However, this response to the  
29 pandemic promotes loneliness. Previous studies have reported an increase in loneliness since  
30 the outbreak of COVID-19, but there is little evidence on the relationship between job stress  
31 and loneliness among remote workers.

32 **Aims:** To assess the relationship between job stress and loneliness among remote workers.

33 **Methods:** This study is a part of nation-wide cross-sectional online survey evaluating the  
34 impact of the COVID-19 pandemic in Japan. A total of 27,036 full-time workers completed  
35 the self-administrated questionnaire in December 2020. We extracted data on 4,052 desk  
36 workers who indicated that they were doing remote work. Loneliness was assessed using a  
37 single question and job stress was measured using the Job Content Questionnaire. Multiple  
38 logistic regression was performed.

39 **Results:** Frequency of remote work was moderately associated with loneliness (adjusted odds  
40 ratio [AOR] = 1.60, 95% confidence interval [CI]: 1.04–2.46,  $P = 0.033$ ). Participants who  
41 reported of having a low level of co-worker or supervisor support had greater odds of feeling  
42 lonely than those who were highly supported (co-worker support: AOR = 4.06, 95% CI:  
43 2.82–5.84,  $P < 0.001$ ; supervisor support: AOR = 2.49, 95% CI: 1.79–3.47,  $P < 0.001$ ).

44 **Conclusions:** Co-worker support and supervisor support were strongly associated with  
45 loneliness, whereas frequency of remote work was moderately associated with feeling lonely.  
46 Support from co-workers and supervisors may be crucial factors to prevent loneliness caused  
47 by remote work.

48  
49 **Key words:** loneliness; occupational mental health; occupational stress; remote work;  
50 telecommuting

## 52 Introduction

53 Loneliness, which has recently become a global concern, is generally defined as a discrepancy  
 54 between an individual's preferred and actual levels of social relations [1]. This discrepancy  
 55 leads to anxiety and distress because of the negative experience of feeling alone [2].  
 56 Loneliness relates not only to stressful and unpleasant feelings but also to critical physical and  
 57 psychological health issues. Although loneliness has often been regarded as a problem  
 58 affecting older adults, it is also a risk for younger people [3]. According to a recent study on  
 59 adults with loneliness [4], the prevalence of loneliness among adults aged 19 to 65 years was  
 60 around 40% to 48%, showing that loneliness is a critical issue for the working generation.  
 61 Although many factors are related to loneliness among adults, the major factors are  
 62 considered to be socioeconomic status and income [5]. In addition, high population density is  
 63 a robust correlate of loneliness [6]. Living alone and frequency of communication with  
 64 neighbours have also been shown to be associated with loneliness [7]. With the addition of  
 65 coronavirus disease 2019 (COVID-19), even more concern has been raised by the social  
 66 issues of loneliness and its related.

67

68 Since the outbreak of the COVID-19 pandemic, work styles have changed dramatically,  
 69 especially for desk workers. In February 2020, the Japanese government issued a basic policy  
 70 describing measures against COVID-19. These measures included a recommendation that  
 71 companies implement teleworking to prevent the spread of COVID-19 [7]. Following the  
 72 continued spread of the disease throughout Japan, the government declared a state of  
 73 emergency in April 2020, further promoting telework and requesting that people refrain from  
 74 going out [8]. As a result, in Japan, the percentage of companies implementing telework  
 75 climbed from 26% in March 2020 to 67% May 2020 [9]. Even after the state of emergency  
 76 ended, an increasing number of companies continued to implement anti-COVID-19 measures

by combining in-person work with remote work [10]. However, the impact of job stress on remote workers is unknown, especially in terms of loneliness. Previous research about teleworking in other countries has indicated that remote workers tend not to be able to establish social work relationships with others and that telework can induce feelings of loneliness [11]. It has been suggested that office workers should spend at least 20% of their work time in the office to prevent feelings of isolation [12].

83

Loneliness was already a critical issue before COVID-19. Physical distancing was then introduced as a crucial societal strategy to prevent the spread of COVID-19; this response to the pandemic further promotes loneliness. Several studies have revealed an increase in loneliness since the outbreak of COVID-19 [13], but no reports have clarified how job stress influences loneliness among remote workers during the pandemic. Therefore, the purpose of this study was to assess the relationship between job stress and loneliness among remote workers. The results will be useful for interventions targeted towards remote workers experiencing loneliness to improve the situation in the work environment.

92

## 93 **Methods**

We conducted a cross-sectional study about COVID-19 among the working-age population in Japan on December 22–26, 2020, under the CORoNaWork (Collaborative Online Research on the Novel-coronavirus and Work) Project [14]. In brief, the CORoNaWork Project is an Internet-based nationwide cross-sectional study conducted during the third wave of COVID-19 infections in Japan. A total of 33,087 participants were selected using cluster sampling with stratification by sex, job type, and region on the basis of COVID-19 incidence rate data. These participants completed an online self-administered questionnaire. After excluding invalid responses, 27,036 participants were eligible for the analysis. In the current study, from these 27,036 participants, we selected the 4,052 desk workers who indicated that

they were doing remote work. The study was conducted according to the guidelines of the Declaration of Helsinki, and it was approved by the Ethics Committee of the University of Occupational and Environmental Health, Japan (Approval number: R2-079).

The original questionnaire of the CORoNaWork Project consists of 54 main questions including items on general demographic characteristics, socioeconomic characteristics, work-related characteristics, lifestyle factors, quality of life, health conditions, and COVID-19-related issues (e.g. preventive measures at the workplace and individual levels, vaccination, telework, and lifestyle changes during COVID-19). For the current study, we included questions on demographic characteristics (age and sex), socioeconomic characteristics (education, annual household income, and household composition), regional state-of-emergency status, frequency of remote work, job stress, and loneliness.

We asked the participants whether they felt lonely during the study period. Loneliness was assessed by a single question: ‘Do you feel alone?’ The response options were *yes* and *no*. The question is a part of the Japanese version of the University of California, Los Angeles (UCLA) Loneliness Scale [15].

We included frequency of remote work and job stress as independent variables in the current study. Frequency of remote work was categorized as once per week, 2 or 3 days per week, or 4 or more days per week. We used the Job Content Questionnaire (JCQ) to evaluate the remote workers’ job stress. The JCQ is a self-administered instrument proposed by Karasek in 1985 [16] that was designed to measure the social and psychological characteristics of jobs on the basis of theoretical models. The original instrument comprises 45 core items; however, in 1995, Japanese researchers first translated the JCQ and developed the Japanese version of the JCQ with 22 items on four topics: co-worker support, supervisor support, psychological job

demands, and decision latitude. The researchers then verified the reliability and validity of the questionnaire among the employees of telecommunication and electric power companies in the Chubu region [17] and among the workers of a computer company [18]. The average score and reliability coefficient of the Japanese version of the JCQ are very similar to the results in other countries; thus, the JCQ is considered to be internationally applicable in occupational settings [16]. Therefore, we used the Japanese version of the JCQ to assess job stress in the current research.

We present descriptive statistics of demographic and socioeconomic characteristics for all participants. Each of the 22 JCQ items had a four-point response ranging from 1 (*strongly disagree*) to 4 (*strongly agree*). The weighted item scores were summed to produce scores on the following four scales, following the authors of the Japanese version of the JCQ: the psychological demands scale (five items, range: 12–48), the decision latitude scale (nine items, range: 24–96), the co-worker support scale (four items, range: 4–16), and the supervisor support scale (four items, range: 4–16) [17]. Each sub-scale was classified into tertiles based on the sample distributions. The *high* group was used as a reference group for co-worker support, supervisor support, and decision latitude, whereas the *low* group was taken as a reference for psychological job demands. Logistic regression analysis was performed to identify the associations of frequency of remote work and the four JCQ scale scores with loneliness. We show the results of both the univariate model and the model adjusting for sex, age, education, income, household composition, and regional state-of-emergency status. Statistical significance was defined as  $P < 0.05$ . Stata/SE 16.1 (StataCorp, College Station, TX, USA) was used for the statistical analysis.

## Results

A total of 4,052 remote workers were analysed in the current study. Table 1 shows the

socio-demographic characteristics of the participants. Over half of the respondents were male (58%), were aged 50–65 years (52%), and had completed a university or graduate school degree (67%). Of the 4,052 remote workers participating in the study, 2,042 (50%) worked remotely 4 or more days per week, 1,058 (26%) worked remotely 2 or 3 days per week, and 952 (24%) worked remotely 1 day per week. Regarding job stress, almost half of all remote workers felt a high level of support from their co-workers (46%) and supervisors (49%). A total of 191 (5%) workers reported feeling lonely.

Table 2 shows the association between job stress and loneliness among remote workers. The highest percentage of loneliness was observed in the group with a low level of support from their co-workers (11%). In the multivariate model, participants who worked remotely 4 or more days per week had significantly greater odds of feeling lonely than those who worked at home once per week (adjusted odds ratio [AOR] = 1.60, 95% confidence interval [CI]: 1.04–2.46,  $P = 0.033$ ). Participants who reported having a low level of co-worker support had greater odds of feeling lonely than those who were highly supported by their co-workers (AOR = 4.06, 95% CI: 2.82–5.84,  $P < 0.001$ ). Those who were less supported by their supervisors also had greater odds of feeling lonely than those who were highly supported by their supervisors (AOR = 2.49, 95% CI: 1.79–3.47,  $P < 0.001$ ). Compared with those who had low psychological job demands, participants who had high demands felt more loneliness (AOR = 2.04, 95% CI: 1.39–2.99,  $P < 0.001$ ). No significant associations were found between decision latitude and feeling lonely.

## Discussion

The present study revealed that frequency of remote work was moderately associated with loneliness among remote workers in Japan. In addition, co-worker and supervisor support and psychological job demands were related to loneliness, whereas decision latitude was not.

These findings provide insight into strategies for improving loneliness resulting from working remotely during the COVID-19 pandemic.

Previous studies in other countries have reported that telework is associated with isolation and loneliness [11, 19]; we found a moderate relationship between frequency of remote work and feeling lonely among Japanese workers in our study. Generally, remote workers are thought to be separated from their colleagues and from work-related social relationships. Consequently, remote workers tend to have fewer opportunities for work-related social interaction and are also distanced from the specific instructions, attention, and praise of their supervisors. Being physically distant from the workplace and from one's colleagues can lead to feelings of isolation and loneliness. This is regarded as the principal problem with telework [19]. Another study found that informal social interaction with colleagues declines for employees working at home, leading to professional isolation [20]. However, in recent years, advanced information and communication technology (ICT) has provided remote workers with opportunities for real - time social interaction [21], which may keep people socially connected and help to overcome feelings of loneliness [22]. Our study was conducted in December 2020, and we assume that most of the remote worker participants had the necessary ICT to work from home. In this situation, remote workers' loneliness might be reduced by using the ICT that has been developed for this purpose. In this study, the frequency of telecommuting was found to be moderately related to feeling lonely. However, a previous study showed that the number of teleworking days per week was not associated with work-related well-being [23], so it may be important to consider how telecommuting is implemented to prevent loneliness and improve workers' well-being.

Our analysis showed that the levels of support provided by co-workers and supervisors were strongly associated with feelings of loneliness among remote workers. Co-worker support



contributed more to reducing loneliness than did supervisor support. A previous study indicated that the subjective experience of feeling physically distant from one's colleagues increased loneliness and was stressful for remote workers [24], which can be taken to suggest the importance of support and connection among colleagues. Furthermore, although there are many opportunities to interact with supervisors through work instructions, even in the context of remote work, the frequency of communication between co-workers may be lower in remote work situations unless the co-workers make a conscious effort to stay in touch. Support from colleagues is likely to be particularly important in preventing the reduction of communication between co-workers.

The present study suggests that, although a middle level of psychological job demands did not affect the presence of loneliness, a high level of psychological job demands was associated with loneliness among remote workers. The presence of loneliness was also not affected by decision latitude. According to Karasek's Demand-Control Model, a higher level of psychological job demands and a lower level of decision latitude result in an employee experiencing a high level of strain [25]; however, we found that, in terms of loneliness, only a high level of psychological job demands was related to loneliness. Therefore, our study indicates that job stress factors are not always associated with loneliness. Previous research has suggested that, if workers face higher levels of psychological work demands, they are more likely to work overtime [26]. As a result, one would expect those in jobs with high psychological demands to decrease the time spent communicating with colleagues and supervisors, which might lead to the experience of loneliness. Regarding decision latitude, it is generally thought that those with lower levels of decision latitude are managed or instructed by their supervisors and senior colleagues. To some extent, receiving instructions from others, as a form of communication, may play a role in preventing these workers from feeling lonely, although a low level of decision latitude is also a known stress factor for workers [25].

233

234 To the best of our knowledge, the present study is the first to report an association between  
 235 job stress and loneliness among remote workers in Japan during the COVID-19 pandemic.  
 236 However, there are several limitations in our study. First, the present study was conducted  
 237 over the Internet, and the generalization of the results is thus unclear. However, to increase the  
 238 external validity and reduce bias as much as possible, we defined the target population  
 239 according to sex, job type, and region on the basis of COVID-19 incidence rate data. In  
 240 addition, remote workers were the target population in this study; these individuals use the  
 241 Internet daily, and some extent of generalizability is therefore guaranteed. Second, although  
 242 there are several measurements of loneliness [27], in the present study, the presence of  
 243 loneliness was assessed through a single question. However, this approach follows previous  
 244 research that used a single item to measure loneliness [27]. Third, the causal relationship  
 245 between remote work and the presence of loneliness is unknown because this was a  
 246 cross-sectional study. Concerns have been raised about the existence of reverse causality in  
 247 this relationship because, for example, certain workers might not choose to work remotely  
 248 because they wish to avoid loneliness. However, during the COVID-19 pandemic, workers  
 249 were not likely to be able to decide the frequency of telecommuting on their own, and the  
 250 possibility of reverse causality is therefore probably low.

251

252 In conclusion, among remote workers in Japan, we found that support from co-workers and  
 253 support from supervisors were strongly associated with loneliness, and frequency of remote  
 254 work showed a moderate association with loneliness. These findings suggest that co-worker  
 255 support and supervisor support may be crucial factors in preventing loneliness caused by  
 256 working remotely. To prevent remote workers from feeling lonely and from developing  
 257 mental health problems following loneliness, remote workers should engage in interaction  
 258 with supervisors and co-workers using the ICT developed for this purpose.

## Key points

### What is already known about this subject

- There has been an increase in loneliness since the outbreak of COVID-19.
- Even before COVID-19, loneliness was a critical issue not only for older adults but also for the working generation.
- Telework can induce feelings of loneliness and isolation.

### What this study adds

- The frequency of telecommuting was moderately associated with loneliness.
- Support from co-workers and support from supervisors were strongly associated with feelings of loneliness.
- A high level of psychological job demands was associated with loneliness, whereas decision latitude was not associated with loneliness.

### What impact this may have on practice or policy

- Supervisors and co-workers may play an important role in preventing remote workers from feeling lonely and from developing mental health problems following loneliness.
- Decreasing psychological job demands may reduce the likelihood of loneliness for remote workers.

## Acknowledgements

We thank the other members of the CORoNaWork Project: Yoshihisa Fujino (present chairperson of the study group), Hajime Ando, Hisashi Eguchi, Arisa Harada, Kyoko Kitagawa, Kosuke Mafune, Ryutaro Matsugaki, Koji Mori, Keiji Muramatsu, Masako Nagata, Ning Liu, Akira Ogami, Rie Tanaka, and Kei Tokutsu.

## Competing interests

None declared.

## Funding

This work was supported and partly funded by the University of Occupational and Environmental Health, Japan; General Incorporated Foundation (Anshin Zaidan): The Development of Educational Materials on Mental Health Measures for Managers at Small-sized Enterprises; Health, Labour and Welfare Sciences Research Grants: Comprehensive Research for Women's Healthcare [grant number H30-josei-ippan-002] and Research for the Establishment of an Occupational Health System in Times of Disaster [grant number H30-roudou-ippan-007]; scholarship donations from Chugai Pharmaceutical Co., Ltd.; the Collabo-Health Study Group; and Hitachi Systems, Ltd.

## References

1. Peplau LA, Perlman D. Perspectives on loneliness. In: Peplau LA, Perlman D, editors. *Loneliness: A sourcebook of current theory, research and therapy*. New York: Wiley; 1982.
2. Weiss RS, editor. *Loneliness: The experience of emotional and social isolation*. Cambridge, MA: MIT Press; 1973
3. Asghar A, Iqbal N. Loneliness matters: a theoretical review of prevalence in adulthood. *J Psychol*. 2019;**7**:41-47.
4. Franssen T, Stijnen M, Hamers F, Schneider F. Age differences in demographic, social and health-related factors associated with loneliness across the adult life span (19-65 years): a cross-sectional study in the Netherlands. *BMC Public Health*. 2020;**20**:1118.
5. Bosma H, Jansen M, Schefman S, Hajema KJ, Feron F. Lonely at the bottom: a cross-sectional study on being ill, poor, and lonely. *Public Health*. 2015;**129**:185-187.
6. Karmakar A, Raychaudhuri S. Loneliness & depression: An urban syndrome. *The International Journal of Indian Psychology*. 2015;**2**:174-82.

- 314 7. Decisions by the Headquarters for Novel Coronavirus Disease Control. Basic Policies for  
315 Novel Coronavirus Disease Control. February 25, 2020. [cited March 28, 2021].  
316 Available from: <https://www.mhlw.go.jp/content/10200000/000603610.pdf>
- 317 8. Decisions by the Headquarters for Novel Coronavirus Disease Control. Basic Policies for  
318 Novel Coronavirus Disease Control (Revised on April 7,2020). April 7, 2020. [cited  
319 March 28, 2021]. Available from:  
320 <https://www.mhlw.go.jp/content/10900000/000620733.pdf>
- 321 9. Situation regarding telework. (written in Japanese) 2020 [cited March 21, 2021] Available  
322 from <https://www.mhlw.go.jp/content/11911500/000662173.pdf>
- 323 10. Tokyo Metropolitan Government. [Results of a survey on telework adoption rates].  
324 January 22, 2021. [cited March 28, 2021]. Available from:  
325 <https://www.metro.tokyo.lg.jp/tosei/hodohappyo/press/2021/01/22/17.html>
- 326 11. Tavares IA. Telework and health effects review. *International Journal of Healthcare*.  
327 2017;**3**:30-36.
- 328 12. Fairweather NB. Surveillance in employment: the case of teleworking. *Journal of*  
329 *Business Ethics*. 1999;**22**:39-49.
- 330 13. Dahlberg L. Loneliness during the COVID-19 pandemic. *Aging Ment Health*.  
331 2021;**25**:1-4.
- 332 14. Fujino Y, Ishimaru T, Eguchi H, et al. Protocol for a nationwide Internet-based health  
333 survey in workers during the COVID-19 pandemic in 2020. *medRxiv*  
334 2021:2021.02.02.21249309
- 335 15. Masuda Y, Tadaka E, Dai Y. Reliability and validity of the Japanese version of the UCLA  
336 Loneliness Scale Version 3 among the older population. *Journal of Japan Academy of*  
337 *Community Health Nursing*. 2012;**15**:25-32
- 338 16. Karasek R, Brisson C, Kawakami N, Houtman I, Bongers P, Amick B. The Job Content  
339 Questionnaire (JCQ): an instrument for internationally comparative assessments of  
340 psychosocial job characteristics. *Journal of occupational health*  
341 *psychology*.1998;**3**:322-355.
- 342 17. Kawakami N, Kobayashi F, Araki S, Haratani T, Furui H: Assessment of job stress  
343 dimensions based on the Job Demands-Control model of employees of  
344 telecommunication and electric power companies in Japan: reliability and validity of  
345 the Japanese version of Job Content Questionnaire. *Int J Behav Med*. 1995;**2**:358-375.
- 346 18. Kawakami N, Fujigaki Y: Reliability and validity of the Japanese version of Job Content  
347 Questionnaire: replication and extension in computer company employees. *Ind Health*.  
348 1996;**34**:295-306.

19. Montreuil S, Lippel K. Telework and occupational health: a Quebec empirical study and regulatory implications. *Safety Science*. 2003;**41**:339-358.
20. Cooper CD, Kurland NB. Telecommuting, professional isolation, and employee development in public and private organizations. *Journal of Organizational Behavior*, 2002;**23**:511–532.
21. McFarland LA, Ployhart RE. Social media: A contextual framework to guide research and practice. *Journal of Applied Psychology*, 2015;**100**:1653–1677.
22. Wang B, Liu Y, Qian J, Parker SK. Achieving Effective Remote Working During the COVID-19 Pandemic: A Work Design Perspective. *Appl Psychol*. 2020 Nov 5:10.1111/apps.12290. doi: 10.1111/apps.12290. Epub ahead of print. PMID: 33230359; PMCID: PMC7675760.
23. Vander Elst T, Verhoogen R, Sercu M, Van den Broeck A, Baillien E, Godderis L. Not Extent of Telecommuting, But Job Characteristics as Proximal Predictors of Work-Related Well-Being. *J Occup Environ Med*. 2017;**59**:e180-e186.
24. Toscano F, Zappalà S. Social Isolation and Stress as Predictors of Productivity Perception and Remote Work Satisfaction during the COVID-19 Pandemic: The Role of Concern about the Virus in a Moderated Double Mediation. *Sustainability*. 2020;**12**:9804; <https://doi.org/10.3390/su12239804>
25. Karasek. R. Job demands, job decision latitude, and mental strain: Implications for job redesign. *Administrative Science Quarterly*. 1979;**24**:285-307.
26. van der Hulst M, van Veldhoven M, Beckers D. Overtime and need for recovery in relation to job demands and job control. *J Occup Health*. 2006;**48**:11-19.
27. Courtin E, Knapp M. Social isolation, loneliness and health in old age: a scoping review. *Health Soc Care Community*. 2017;**25**:799-812

375 Table 1 General characteristics of the study participants

|                                        | Total<br><i>n</i> = 4,052 |
|----------------------------------------|---------------------------|
| Sex                                    |                           |
| Female                                 | 1,689 (42)                |
| Male                                   | 2,363 (58)                |
| Age (years)                            |                           |
| 20–39                                  | 807 (20)                  |
| 40–49                                  | 1,128 (28)                |
| 50–65                                  | 2,117 (52)                |
| Education                              |                           |
| Junior high or high school             | 617 (15)                  |
| Vocational school or college           | 734 (18)                  |
| University or graduate school          | 2,701 (67)                |
| Annual household income (Japanese yen) |                           |
| < 4 million                            | 890 (22)                  |
| ≥ 4 million and < 8 million            | 1,554 (38)                |
| ≥ 8,000,000                            | 1,608 (40)                |
| Household composition                  |                           |
| Single                                 | 912 (22)                  |
| Couple                                 | 1,156 (29)                |
| 3 or more persons                      | 1,984 (49)                |
| Regional state-of-emergency status     |                           |
| No (34 prefectures)                    | 1,485 (37)                |
| Yes (13 prefectures)                   | 2,567 (63)                |
| Co-worker support                      |                           |
| High (12–16 points)                    | 1,877 (46)                |
| Middle (10 or 11 points)               | 1,170 (29)                |
| Low (4–9 points)                       | 1,005 (25)                |
| Supervisor support                     |                           |
| High (12–16 points)                    | 1,965 (49)                |
| Middle (9–11 points)                   | 609 (15)                  |
| Low (4–8 points)                       | 1,478 (36)                |
| Psychological job demand               |                           |
| High (32–48 points)                    | 1,362 (34)                |
| Middle (27–31 points)                  | 1,341 (33)                |
| Low (12–26 points)                     | 1,349 (33)                |
| Decision latitude                      |                           |
| High (71–96 points)                    | 1,262 (31)                |
| Middle (63–70 points)                  | 1,628 (40)                |
| Low (26–62 points)                     | 1,162 (29)                |
| Frequency of remote work               |                           |
| 1 day/week                             | 952 (24)                  |
| 2 or 3 days/week                       | 1,058 (26)                |
| 4 or more days/week                    | 2,042 (50)                |
| Loneliness                             |                           |
| Yes                                    | 191 (5)                   |
| No                                     | 3,861 (95)                |

Table 2 Association between job stress and loneliness among remote workers (n=4,052)

|                          | Participants | Loneliness | Univariate |             |                | Adjusted* |             |                |
|--------------------------|--------------|------------|------------|-------------|----------------|-----------|-------------|----------------|
|                          | <i>n</i>     | %          | OR         | (95% CI)    | <i>P</i> value | OR        | (95% CI)    | <i>P</i> value |
| Frequency of remote work |              |            |            |             |                |           |             |                |
| 1 day/week               | 952          | 3          | 1.00       | -           | -              | 1.00      | -           | -              |
| 2 or 3 days/week         | 1,058        | 5          | 1.60       | (0.99–2.57) | 0.049          | 1.59      | (0.98–2.56) | 0.059          |
| 4 or more days/week      | 2,042        | 6          | 1.95       | (1.28–2.97) | 0.002          | 1.60      | (1.04–2.46) | 0.033          |
| Co-worker support        |              |            |            |             |                |           |             |                |
| High (12–16 points)      | 1,877        | 3          | 1.00       | -           | -              | 1.00      | -           | -              |
| Middle (10 or 11 points) | 1,170        | 3          | 1.34       | (0.86–2.07) | 0.191          | 1.33      | (0.85–2.06) | 0.209          |
| Low (4–9 points)         | 1,005        | 11         | 4.74       | (3.33–6.76) | <0.001         | 4.06      | (2.82–5.84) | <0.001         |
| Supervisor support       |              |            |            |             |                |           |             |                |
| High (12–16 points)      | 1,965        | 3          | 1.00       | -           | -              | 1.00      | -           | -              |
| Middle (9–11 points)     | 609          | 3          | 1.02       | (0.60–1.75) | 0.944          | 1.05      | (0.61–1.80) | 0.872          |
| Low (4–8 points)         | 1,478        | 8          | 2.85       | (2.06–3.94) | <0.001         | 2.49      | (1.79–3.47) | <0.001         |
| Psychological job demand |              |            |            |             |                |           |             |                |
| High (32–48 points)      | 1,362        | 5          | 1.71       | (1.18–2.47) | 0.004          | 2.04      | (1.39–2.99) | <0.001         |
| Middle (27–31 points)    | 1,341        | 4          | 1.06       | (0.73–1.55) | 0.752          | 1.10      | (0.75–1.62) | 0.619          |
| Low (12–26 points)       | 1,349        | 5          | 1.00       | -           | -              | 1.00      | -           | -              |
| Decision latitude        |              |            |            |             |                |           |             |                |
| High (71–96 points)      | 1,262        | 4          | 1.00       | -           | -              | 1.00      | -           | -              |
| Middle (63–70 points)    | 1,628        | 4          | 0.81       | (0.56–1.17) | 0.258          | 0.80      | (0.55–1.17) | 0.250          |
| Low (26–62 points)       | 1,162        | 7          | 1.11       | (0.79–1.56) | 0.560          | 0.99      | (0.69–1.42) | 0.945          |

OR: odds ratio; CI: confidence interval

\* Adjusted for sex, age, education, annual household income, household composition, and regional state-of-emergency status.
